# Supplementary material for: New Faecal Calprotectin Assay by IDS: Validation and Comparison to DiaSorin Method
Source: MDPI journal article supplement (doi:10.3390/diagnostics12102338), 2022-09-27
Supplement: s1 [file s1]

Table S1. user satisfaction form.

| Criterion | Sensitivity | 95% CI      | Specificity | 95% CI      |
|-----------|-------------|-------------|-------------|-------------|
| >26µg/g   | 90.24       | 76.9 - 97.3 | 52.63       | 40.8 - 64.2 |
| >132µg/g  | 65.85       | 49.4 - 79.9 | 86.84       | 77.1 - 93.5 |
| >248µg/g  | 51.22       | 35.1 - 67.1 | 92.11       | 83.6 - 97.0 |
